# Supplementary material for: Characterisation of the sol–gel process in the superconducting NdBa2Cu3O7−ysystem
Source: Royal Society of Chemistry journal article supplement (doi:10.1039/b614149h), 2007-01-01
Supplement: b614149h.pdf [file b614149h.pdf]

## Electronic supplementary information (ESI)

### Tables

Table S1 Overall and stepwise protonation constant of TEA (25 °C, 0.10 M KNO<sub>3</sub>; T = TEA, H = H<sup>+</sup>)

| Stoichiometry |   |                    |                             | log <i>K</i>          |
|---------------|---|--------------------|-----------------------------|-----------------------|
| y             |   |                    |                             |                       |
| T             | H | log β <sup>a</sup> | Stepwise constant, <i>K</i> | <i>I</i> <sup>b</sup> |
| 1             | 1 | 7.81               | [TH]/[T][H]                 | 7.81 (7.8)            |

<sup>a</sup> Estimated error = ± 0.02

<sup>b</sup> Values in parentheses are literature values.

Table S2 Overall formation constants (β) (Cu(II)-TEA) for the interaction of Cu(II) with TEA (M= Cu<sup>2+</sup>, T = TEA, H = H<sup>+</sup>; *I* = 0.10 M (KNO<sub>3</sub>), 25.0 °C)

| Stoichiometry |   |    |                    |                                                  | log <i>K</i>          |
|---------------|---|----|--------------------|--------------------------------------------------|-----------------------|
| M             | T | H  | log β <sup>a</sup> | Stepwise constant, <i>K</i>                      | <i>I</i> <sup>b</sup> |
| 1             | 1 | 0  | 3.85(3)            | [MT]/[M][T]                                      | 3.85 (4.07)           |
| 1             | 1 | -1 | -1.74(1)           | [MT]/[MTOH][H]                                   | 5.59 (5.41)           |
| 1             | 1 | -2 | -9.21(1)           | [MTOH]/[MT(OH) <sub>2</sub> ][H]                 | 7.47                  |
| 1             | 1 | -3 | -20.52(2)          | [MT(OH) <sub>2</sub> ]/[MT(OH) <sub>3</sub> ][H] | 11.31                 |

<sup>a</sup> Estimated error = ± 0.02

<sup>b</sup> Values in parentheses are literature values

Table S3: Overall formation constants ( $\beta$ ) (Nd(III)-TEA) for the interaction of Nd(III) with TEA (M= Nd<sup>3+</sup>, T = TEA, H = H<sup>+</sup>; I = 0.10 M (KNO<sub>3</sub>), 25.0 °C)

| Stoichiometry |   |    | log $\beta^a$ | Stepwise constant, $K$ | log $K$ |
|---------------|---|----|---------------|------------------------|---------|
| M             | T | H  |               |                        | T       |
| 1             | 1 | 0  | 2.23          | [MT]/[M][T]            | 2.23    |
| 1             | 1 | -1 | -5.41         | [MT]/[MTOH][H]         | 7.64    |

<sup>a</sup> Estimated error =  $\pm 0.06$

Table S4: Overall and stepwise protonation constant of Citric Acid (25 °C, 0.10 M KNO<sub>3</sub>; CA = Citrate, H = H<sup>+</sup>)

| Stoichiometry |   | log $\beta^a$ | Stepwise constant, $K$                     | log $K$         |
|---------------|---|---------------|--------------------------------------------|-----------------|
| CA            | H |               |                                            | CA <sup>b</sup> |
| 1             | 1 | 5.72          | [HCA]/[H][CA]                              | 5.72 (5.69)     |
| 1             | 2 | 10.10         | [H <sub>2</sub> CA]/[H][HCA]               | 4.38 (4.35)     |
| 1             | 3 | 13.05         | [H <sub>3</sub> CA]/[H][H <sub>2</sub> CA] | 2.95 (2.87)     |

<sup>a</sup> Estimated error =  $\pm 0.02$

<sup>b</sup> Values in parentheses are literature values.

Table S5: Overall formation constants ( $\beta$ ) (Cu(II)-CA) for the interaction of Cu(II) with CA (M= Cu<sup>2+</sup>, CA = CA, H = H<sup>+</sup>; I = 0.10 M (KNO<sub>3</sub>), 25.0 °C)

| Stoichiometry |    |    | log $\beta^a$ | Stepwise constant, $K$ | log $K$        |
|---------------|----|----|---------------|------------------------|----------------|
| M             | CA | H  |               |                        | T <sup>b</sup> |
| 1             | 1  | 1  | 9.26(3)       | [MHCA]/[M][HCA]        | 3.36 (3.42)    |
| 1             | 1  | 0  | 5.90(1)       | [MCA]/[M][CA]          | 5.90 (5.90)    |
| 1             | 1  | -1 | 1.60(2)       | [MCA]/[MTCA][H]        | 4.30 (4.34)    |

<sup>a</sup> Estimated error =  $\pm 0.02$

<sup>b</sup> Values in parentheses are literature values (20,0 °C)

Table S6: Overall formation constants ( $\beta$ ) (Nd(III)-CA) for the interaction of Nd(III) with CA (M= Nd<sup>3+</sup>, CA = CA, H = H<sup>+</sup>; I = 0.10 M (KNO<sub>3</sub>), 25.0 °C)

| Stoichiometry |    |    | log $K$       |                                                                      |       |
|---------------|----|----|---------------|----------------------------------------------------------------------|-------|
| M             | CA | H  | log $\beta^a$ | Stepwise constant, $K$                                               | $T$   |
| 1             | 1  | 1  | 10.36(3)      | [MHCA]/[MCA][H]                                                      | 3.12  |
| 1             | 1  | 0  | 7.24(1)       | [MCA]/[M][CA]                                                        | 7.24  |
| 1             | 2  | 0  | 11.49(2)      | [MCA <sub>2</sub> ]/[M][CA] <sup>2</sup>                             | 11.49 |
| 3             | 4  | 0  | 31.82(9)      | [M <sub>3</sub> CA <sub>4</sub> ]/[M] <sup>3</sup> [CA] <sup>4</sup> | 31.82 |
| 3             | 4  | -2 | 18.31(9)      |                                                                      |       |
| 3             | 4  | -4 | 2.88(6)       |                                                                      |       |
| 3             | 4  | -5 | -8.28(14)     |                                                                      |       |

<sup>a</sup> Standard deviations in parentheses.

Table S7: Characteristic IR frequencies

| Group                                 | Band (cm <sup>-1</sup> ) | Intensity | Remarks          |
|---------------------------------------|--------------------------|-----------|------------------|
| -CH <sub>3</sub> , -CH <sub>2</sub> - | 3100-2800                | Medium    | C-H stretching   |
|                                       | 1430-1410                | Medium    | C-H deformations |
| -CH <sub>2</sub> OH                   | 3400-3200                | Strong    | Polymeric OH     |
|                                       | 1300-1200                | Medium    | OH bending       |
|                                       | 1100-1000                | Strong    | C-O stretch      |
| -COOH                                 | 3500-3200                | Strong    | -                |
|                                       | 1700-1550                | Strong    |                  |
|                                       | 1350-1340                | Strong    |                  |
|                                       | 950-825                  | Medium    |                  |
| R <sub>3</sub> N                      | 1310-1360                | Strong    | C-N stretch      |

## Figures

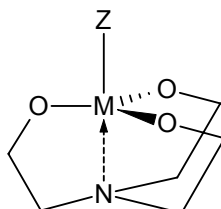

Fig. S1: Metal-TEA complex

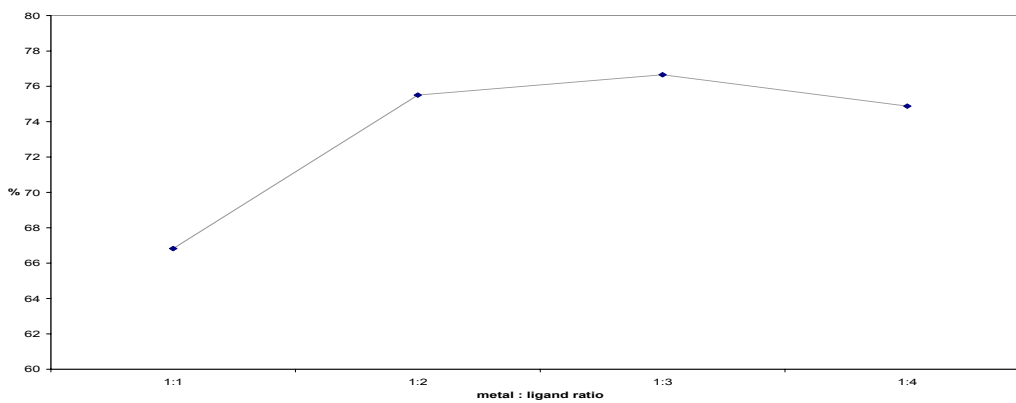

Fig. S2: Percentage  $\text{CuL}(\text{OH})^+$  as a function of the metal/ligand ratio.

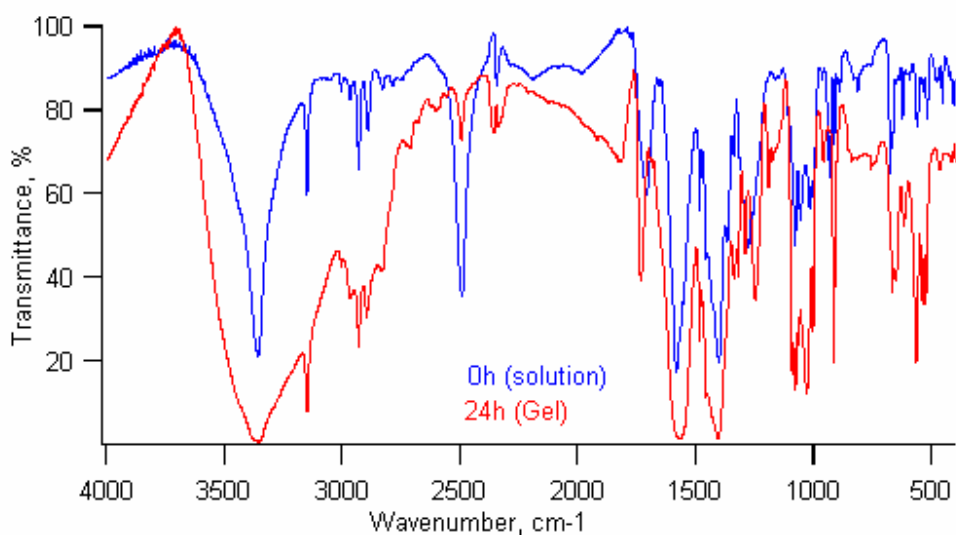

Fig. S3: IR spectrum of the acetate-TEA precursor solution (blue) and gel (red) after a drying time of 24 h at 60°C.

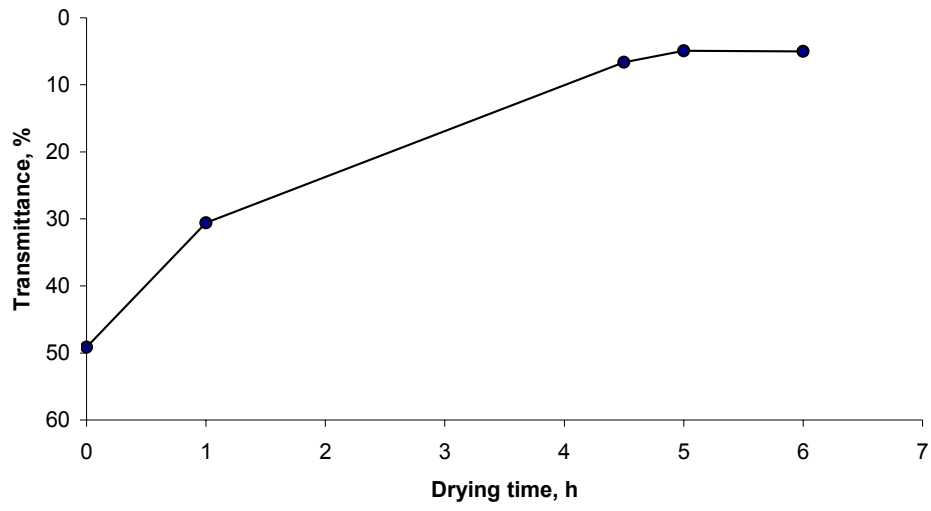

Fig. S4: Dependence of the observed intensity of absorption on the drying time.

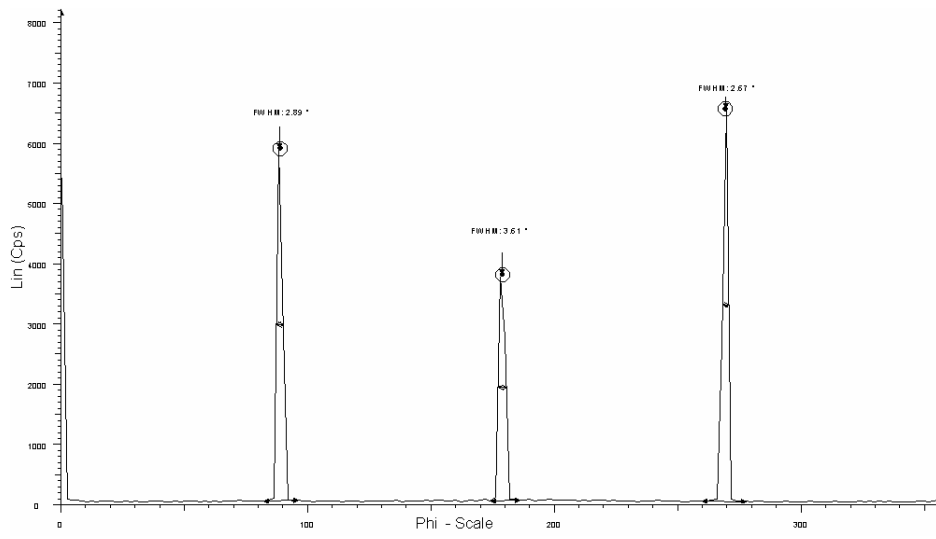

Fig. S5:  $\Phi$ -scan of NBCO film
